# Supplementary material for: A comparative study on the interaction of gold nanoparticles with trypsin and pepsin: thermodynamic perspectives
Source: Royal Society of Chemistry journal article supplement (doi:10.1039/d2nj04020d), 2022-01-01
Supplement: d2nj04020d1.pdf [file d2nj04020d1.pdf]

**Comparative study on the interaction of gold nanoparticles with  
trypsin and pepsin: Thermodynamical perspectives**

Xiangrong Li <sup>a, \*</sup>, Xiaoyi Ma <sup>b</sup>, Congxiao Zhang <sup>b</sup>, Ruonan Xu <sup>a</sup>

<sup>a</sup> Department of Medical Chemistry, Key Laboratory of Medical Molecular Probes, School of Basic Medicine,  
Xinxiang Medical University, Xinxiang, Henan, 453003, PR China

<sup>b</sup> Grade 2018, School of Pharmacy, Xinxiang Medical University, Xinxiang, Henan, 453003, PR China

\*Address correspondence to Xiangrong Li, Department of Medical Chemistry, School of Basic Medicine,  
Xinxiang Medical University, Xinxiang, Henan, 453003, PR China

Postal address: Department of Medical Chemistry, School of Basic Medicine, Xinxiang Medical University, 601

Jin-sui Road, Hong Qi District, Xinxiang, 453003, PR China

Tel: +86-373-3029128

E-mail: 1842457577@qq.com

The short title: The interaction of gold nanoparticles with trypsin and pepsin.

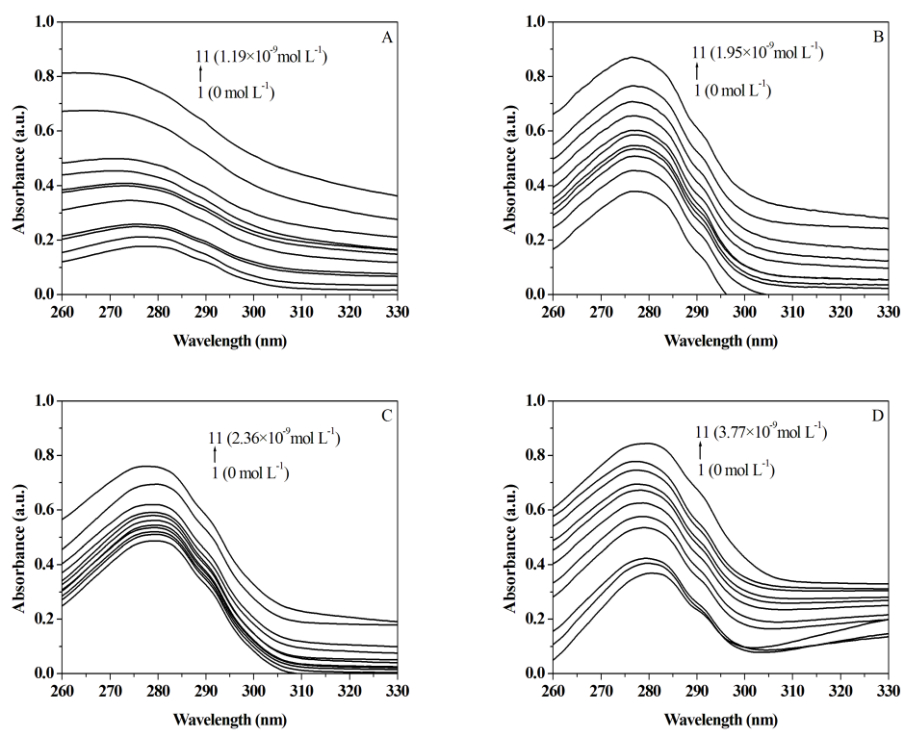

Figure S1. UV-vis absorption spectra of trypsin (A, C) and pepsin (B, D) in the presence of different concentrations of 17 nm and 30 nm AuNPs at 298 K, respectively.  $c$  (trypsin) =  $5.0 \times 10^{-6} \text{ mol L}^{-1}$  (A) or  $2.0 \times 10^{-5} \text{ mol L}^{-1}$  (C),  $c$  (pepsin) =  $1.0 \times 10^{-5} \text{ mol L}^{-1}$  (B, D).

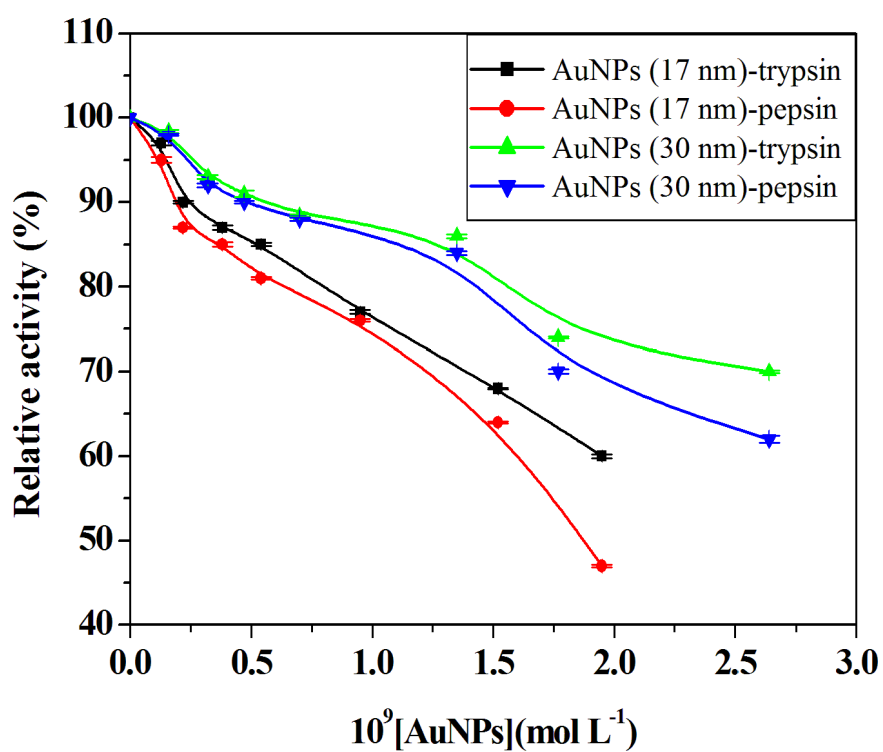

Figure S2. Effect of AuNPs concentration on the trypsin/pepsin activity.  $c(\text{trypsin}) = c(\text{pepsin}) = 4.0 \times 10^{-5} \text{ mol L}^{-1}$ ,  
 $c(17 \text{ nm AuNPs}) / (10^{-9} \text{ mol L}^{-1}) = 0.13, 0.22, 0.38, 0.54, 0.95, 1.52 \text{ and } 1.95$ .  $c(30 \text{ nm AuNPs}) / (10^{-9} \text{ mol L}^{-1}) =$   
 $0.16, 0.32, 0.47, 0.70, 1.35, 1.77 \text{ and } 2.64$ .

Table S1. All time-resolved parameters of trypsin/pepsin in the absence and presence of AuNPs.

| System                | $c(\text{AuNPs})$     | $\tau_1$ (ns) | $\tau_2$ (ns) | $a_1$ | $a_2$ | $\tau_{\text{avg}}$ (ns) | $\chi^2$ |
|-----------------------|-----------------------|---------------|---------------|-------|-------|--------------------------|----------|
| Native trypsin        | /                     | 2.316         | 5.948         | 0.936 | 0.064 | 2.858                    | 1.000    |
| AuNPs (17 nm)-trypsin | $1.19 \times 10^{-9}$ | 2.012         | 4.112         | 0.854 | 0.146 | 2.557                    | 1.000    |
| AuNPs (30 nm)-trypsin | $2.36 \times 10^{-9}$ | 2.464         | 5.364         | 0.879 | 0.121 | 3.130                    | 1.000    |
| Native pepsin         | /                     | 3.565         | 5.489         | 0.229 | 0.771 | 5.178                    | 1.000    |
| AuNPs (17 nm)-pepsin  | $1.95 \times 10^{-9}$ | 3.280         | 5.786         | 0.189 | 0.811 | 5.495                    | 1.007    |
| AuNPs (30 nm)-pepsin  | $3.77 \times 10^{-9}$ | 3.473         | 5.355         | 0.007 | 0.993 | 5.346                    | 1.000    |

Table S2. Secondary structure analysis from native trypsin/pepsin and AuNPs-trypsin/pepsin system at 298 K using CDNN program.

| System                | $c(\text{AuNPs})$     | CDNN (program)      |                  |              |                   |                |
|-----------------------|-----------------------|---------------------|------------------|--------------|-------------------|----------------|
|                       |                       | $\alpha$ -Helix (%) | Antiparallel (%) | Parallel (%) | $\beta$ -Turn (%) | Rndm. coil (%) |
| Native trypsin        | /                     | 6.8                 | 41.3             | 5.6          | 17.0              | 29.3           |
| AuNPs (17 nm)-trypsin | $0.49 \times 10^{-9}$ | 6.9                 | 41.4             | 5.6          | 16.8              | 29.3           |
|                       | $1.19 \times 10^{-9}$ | 6.8                 | 41.4             | 5.6          | 16.9              | 29.3           |
| AuNPs (30 nm)-trypsin | $0.70 \times 10^{-9}$ | 6.6                 | 41.3             | 5.6          | 17.0              | 29.5           |
|                       | $2.36 \times 10^{-9}$ | 6.6                 | 41.4             | 5.6          | 17.1              | 29.4           |
| Native pepsin         | /                     | 7.4                 | 39.8             | 5.6          | 17.4              | 29.8           |
| AuNPs (17 nm)-pepsin  | $0.70 \times 10^{-9}$ | 7.6                 | 39.7             | 5.6          | 17.3              | 29.8           |
|                       | $1.95 \times 10^{-9}$ | 7.7                 | 39.2             | 5.6          | 17.3              | 30.2           |
| AuNPs (30 nm)-pepsin  | $1.68 \times 10^{-9}$ | 7.5                 | 39.3             | 5.6          | 17.3              | 30.3           |
|                       | $3.77 \times 10^{-9}$ | 7.6                 | 39.1             | 5.6          | 17.3              | 30.4           |
